# Supplementary material for: A simple, one-pot synthesis of molybdenum oxide-reduced graphene oxide composites in supercritical methanol and their electrochemical performance
Source: Royal Society of Chemistry journal article supplement (doi:10.1039/c6ra24632j), 2016-01-01
Supplement: c6ra24632j1.pdf [file c6ra24632j1.pdf]

Supplementary data

**A Simple, One-pot Synthesis of Molybdenum Oxide-Reduced Graphene Oxide Composites  
in Supercritical Methanol and Their Electrochemical Performance**

*Jieun Hwang<sup>1</sup>, Dohyeon Yoon<sup>1</sup>, Boyoung Kweon<sup>1</sup>, Wonyoung Chang<sup>2</sup>, Jaehoon Kim<sup>\*1,3</sup>*

<sup>1</sup> School of Mechanical Engineering, Sungkyunkwan University,

2066 Seobu-ro, Jangan-gu, Suwon, Gyeonggi-do, 16419, Republic of Korea

<sup>2</sup> Center for Energy Convergence, Korea Institute of Science and Technology,

Hwarang-ro 14-gil 5, Seongbuk-gu, Seoul, 02792, Republic of Korea.

<sup>3</sup> Sungkyun Advanced Institute of Nano Technology (SAINT), Sungkyunkwan University,

2066 Seobu-ro, Jangan-gu, Suwon, Gyeonggi-do, 16419, Republic of Korea

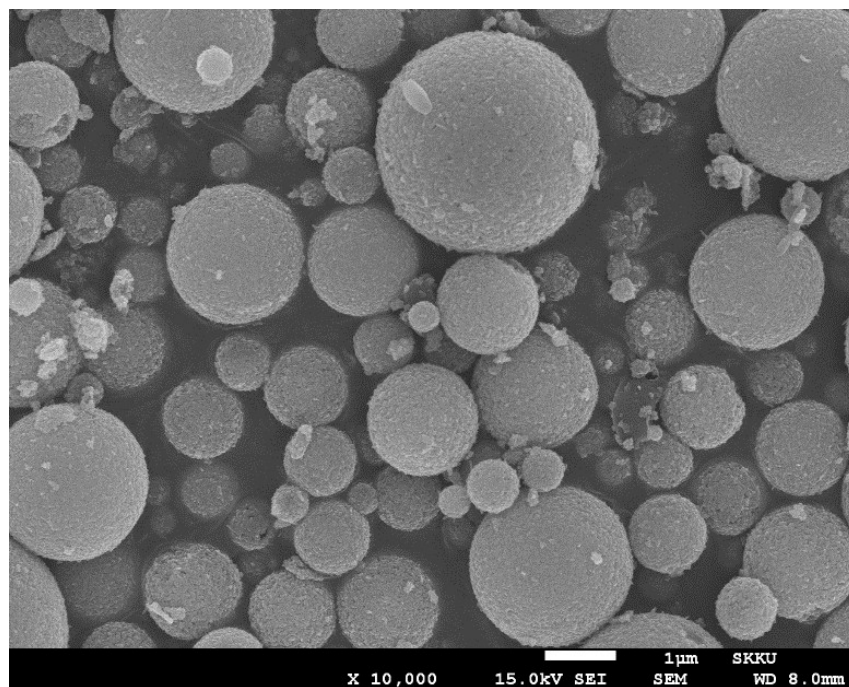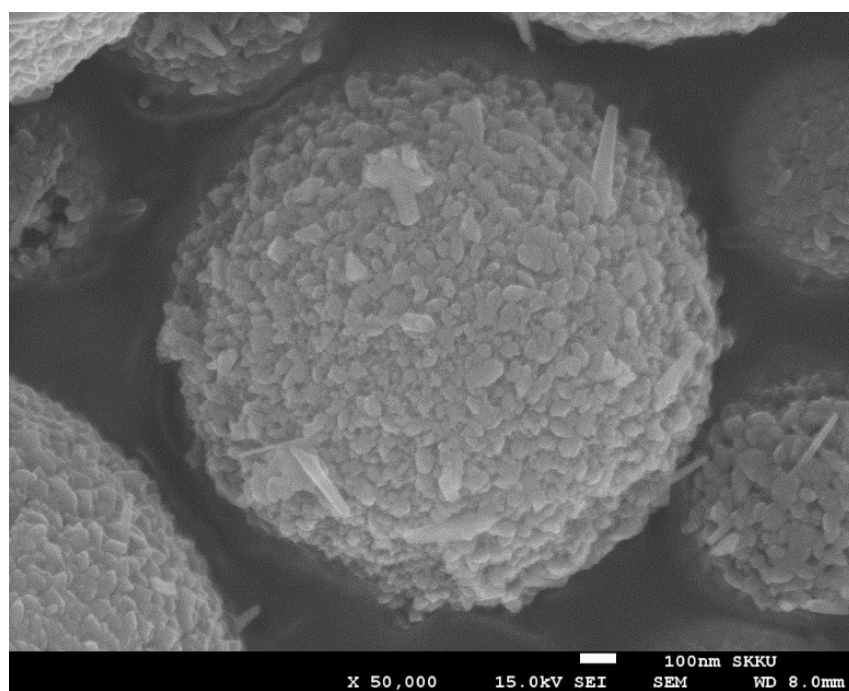

**Fig. S1.** SEM image of the bare MoO<sub>2</sub> particles

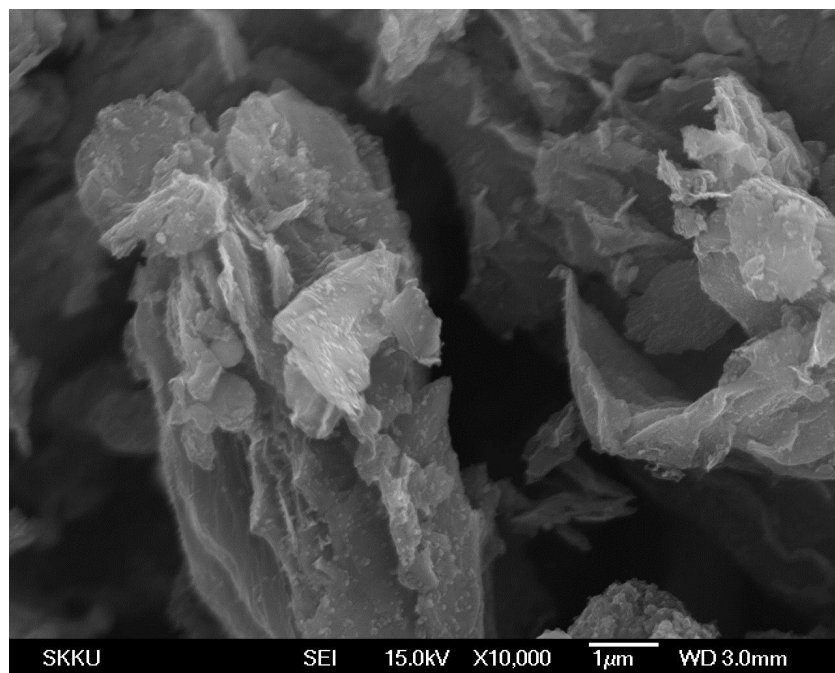

(a)

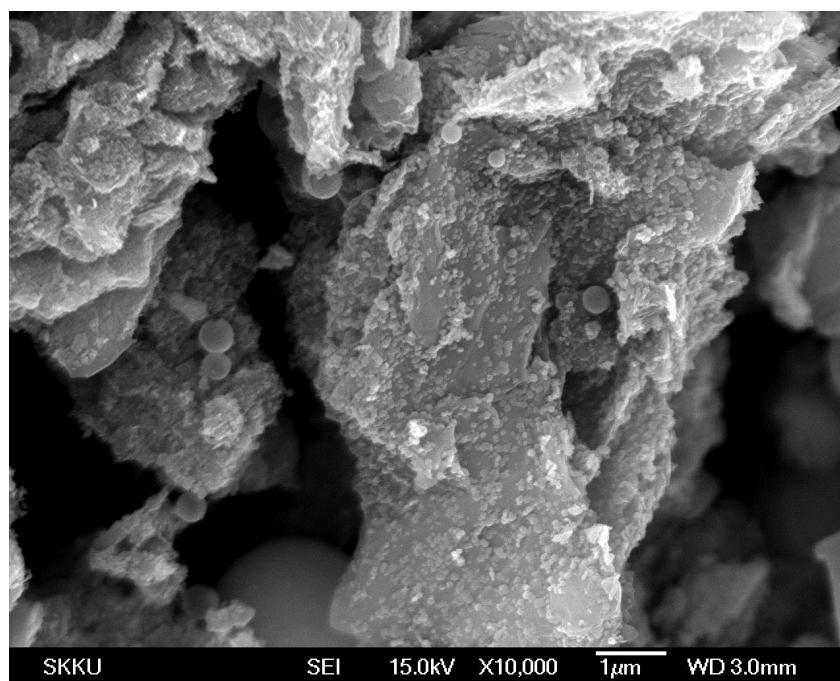

(b)

**Fig. S2.** SEM image of (a) MoO<sub>2</sub>-SRGO-1 and (b) MoO<sub>2</sub>-SRGO-3

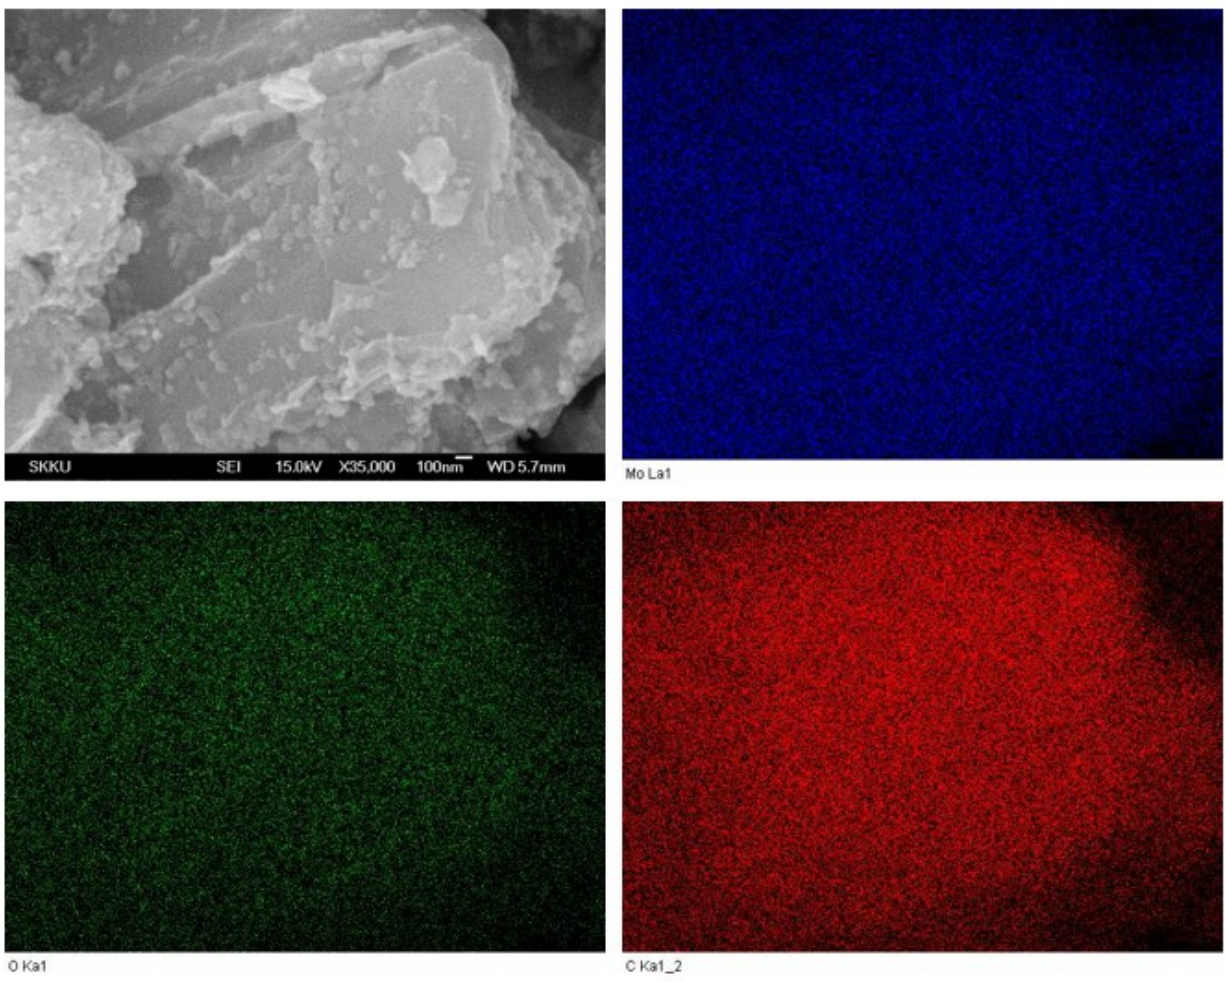

**Fig. S3.** EDS mapping image of MoO<sub>2</sub>-SRGO-2 about molybdenum (blue), oxygen (green), and carbon (red)

**Table S1.** Refined lattice parameters of C-MoO<sub>2</sub> and MoO<sub>2</sub>-SRGO composites.

| Sample code              | a (Å)  | b (Å)  | c (Å)  |
|--------------------------|--------|--------|--------|
| C-MoO <sub>2</sub>       | 5.6011 | 4.8793 | 5.6100 |
| MoO <sub>2</sub> -SRGO-1 | 5.6862 | 4.8058 | 5.7025 |
| MoO <sub>2</sub> -SRGO-2 | 5.6619 | 4.7537 | 5.7332 |
| MoO <sub>2</sub> -SRGO-3 | 5.6641 | 4.7671 | 5.6739 |

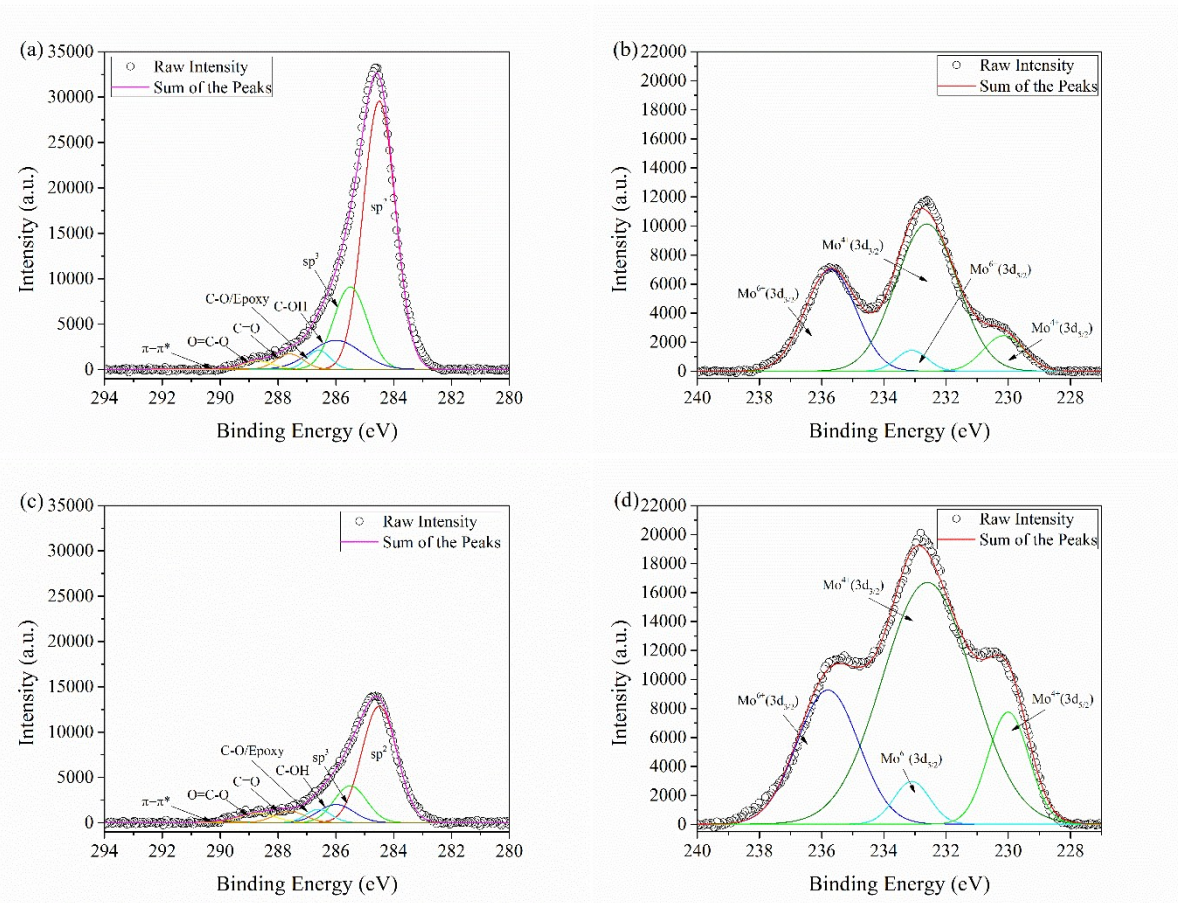

**Fig. S4.** High-resolution XPS spectra of C 1s and Mo 3d for (a), (b) MoO<sub>2</sub>-SRGO-1 and (c), (d) MoO<sub>2</sub>-SRGO-3

**Table S2.** C 1s XPS peak deconvolution results

| Peaks                    | Peak Position (eV) | GO     | SRGO   | MoO <sub>2</sub> -SRGO-1 (area%) | MoO <sub>2</sub> -SRGO-2 | MoO <sub>2</sub> -SRGO-3 |
|--------------------------|--------------------|--------|--------|----------------------------------|--------------------------|--------------------------|
| sp <sup>2</sup> carbon   | 284.5              | 36.8   | 66.6   | 61.5                             | 64.0                     | 58.5                     |
| sp <sup>3</sup> carbon   | 285.5              | 0.00   | 6.3    | 19.7                             | 13.0                     | 17.1                     |
| C-OH                     | 286.0              | 2.89   | 7.4    | 10.3                             | 9.2                      | 9.2                      |
| C-O/epoxy                | 286.6              | 45.4   | 4.9    | 3.2                              | 6.0                      | 4.8                      |
| C=O                      | 287.6              | 7.48   | 3.2    | 3.1                              | 3.3                      | 5.1                      |
| O=C-O                    | 288.7              | 7.40   | 1.6    | 1.7                              | 3.2                      | 4.7                      |
| $\pi$ - $\pi^*$ shake-up | 289.9              | 0.00   | 10.0   | 0.5                              | 1.3                      | 0.6                      |
| Maximum Fitting Error    | ( $\sum x^2$ )     | 0.5032 | 3.5274 | 0.8647                           | 0.6402                   | 0.6155                   |

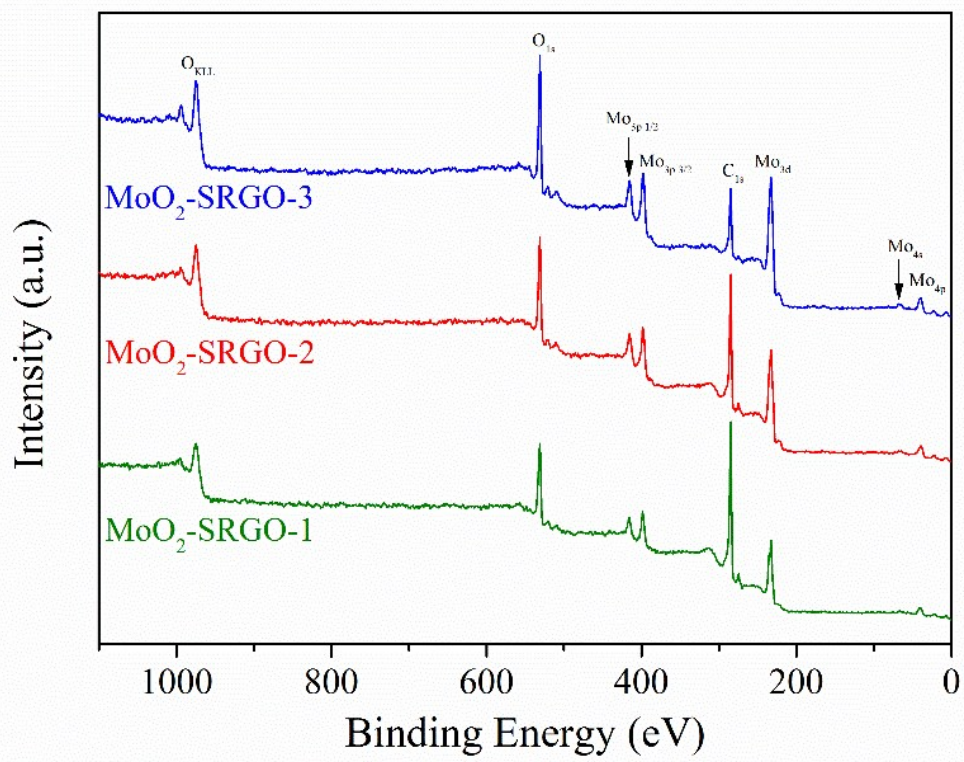

**Fig. S5.** XPS survey scan spectra of the MoO<sub>2</sub>-SRGO composites



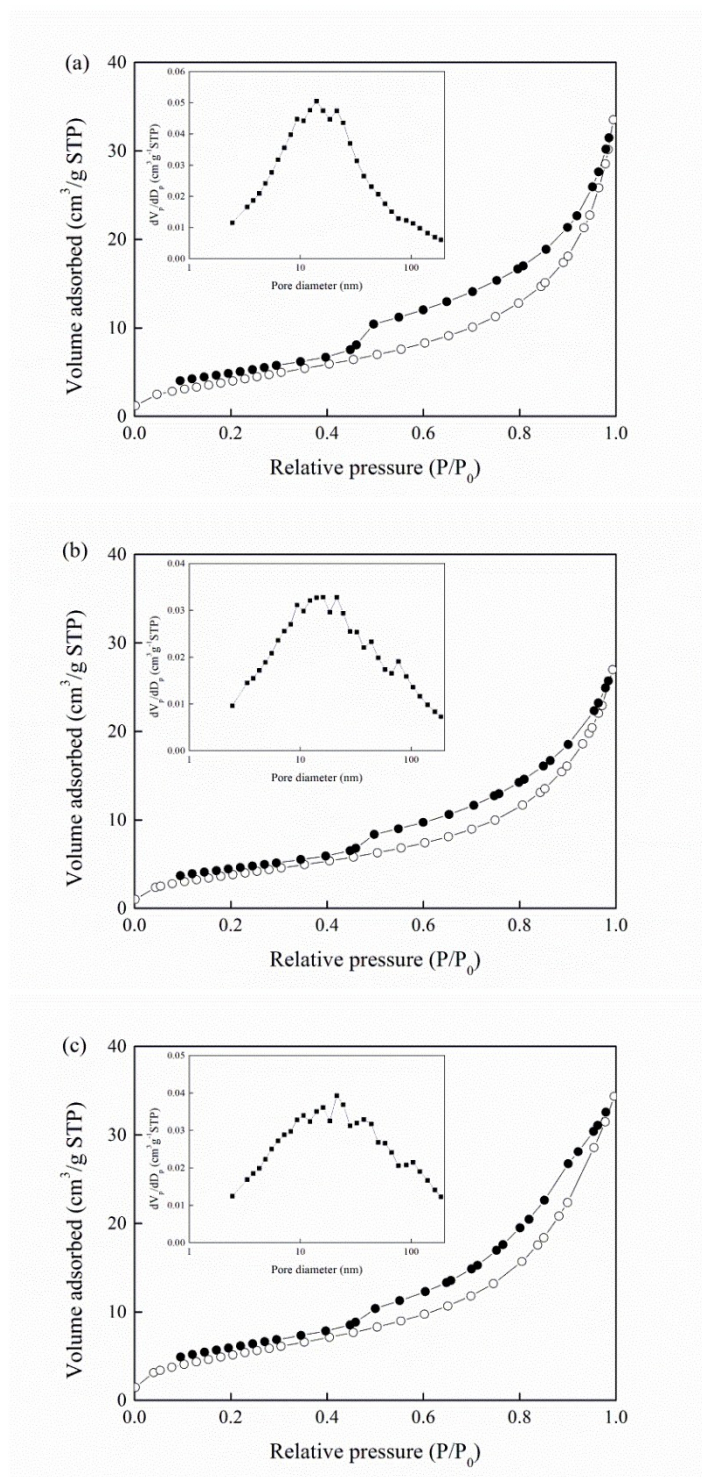

**Fig. S6.**  $N_2$  adsorption-desorption isotherms of (a) MoO<sub>2</sub>-SRGO-1, (b) MoO<sub>2</sub>-SRGO-2 and (c) MoO<sub>2</sub>-SRGO-3

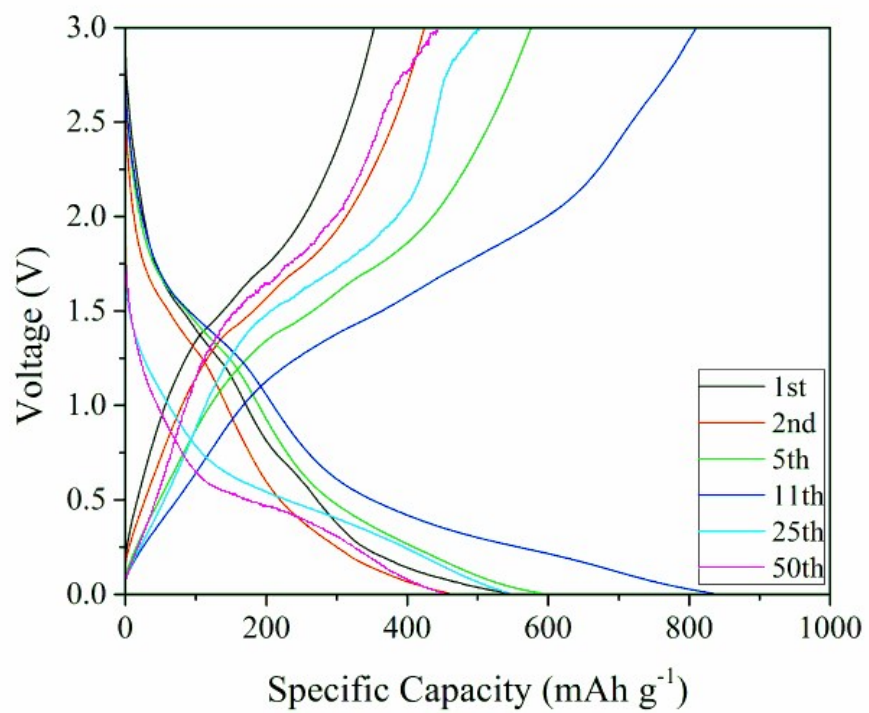

**Fig. S7.** Charge-discharge profile of the C-MoO<sub>2</sub> sample

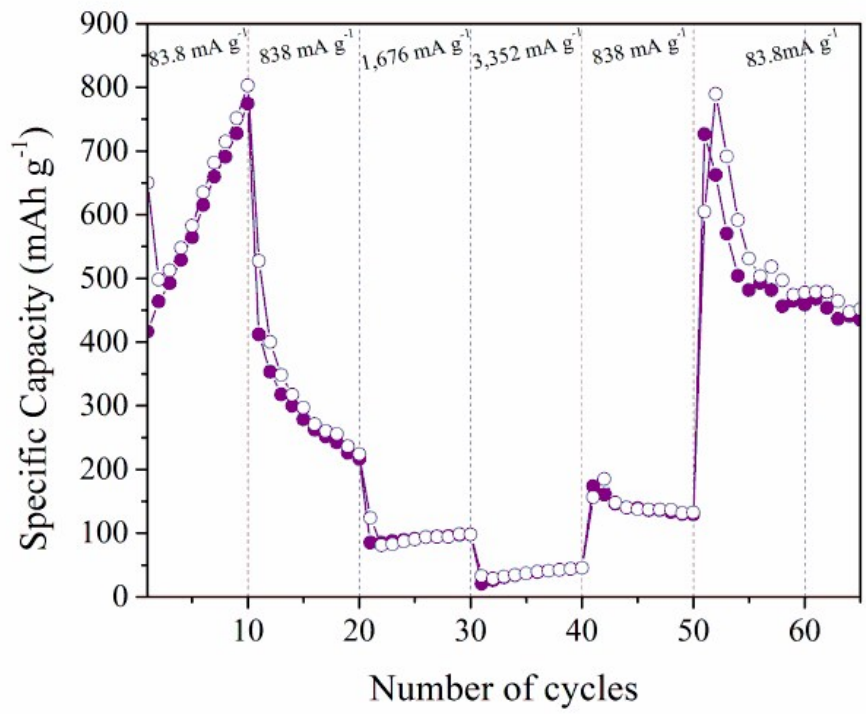

**Fig. S8** Rate performance of C-MoO<sub>2</sub>

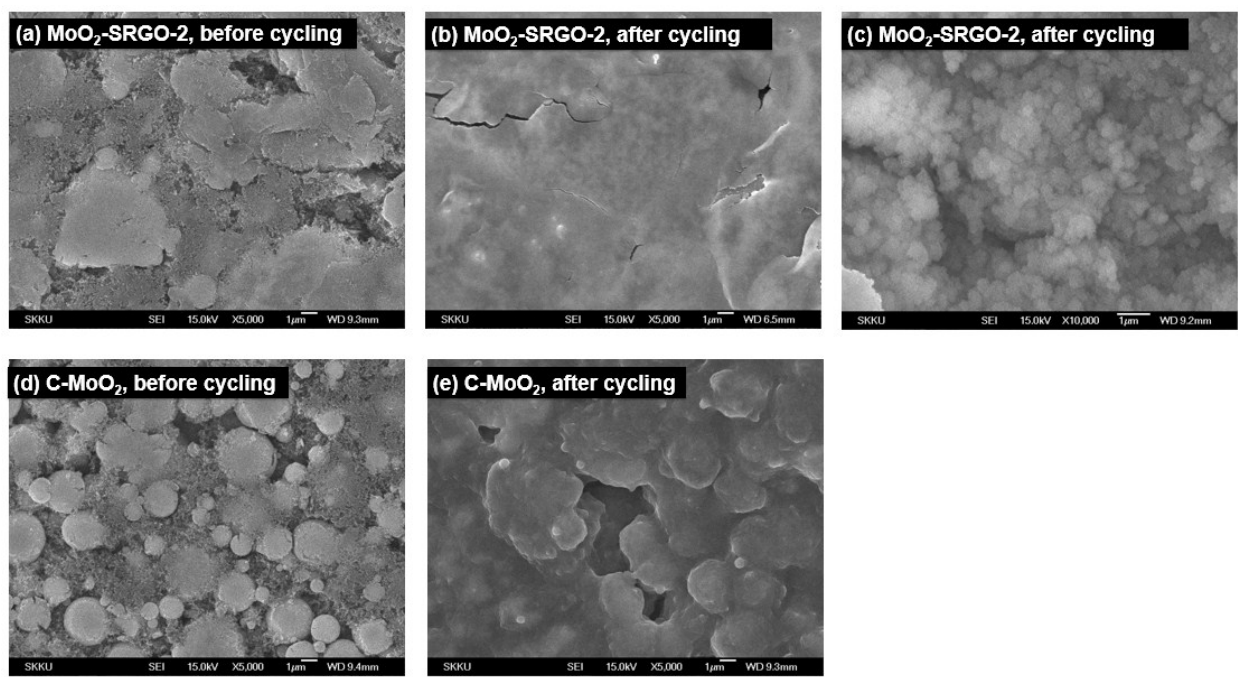

**Fig. S9** SEM images of MoO<sub>2</sub>-SRGO-2 and C-MoO<sub>2</sub> before and after 100 cycles

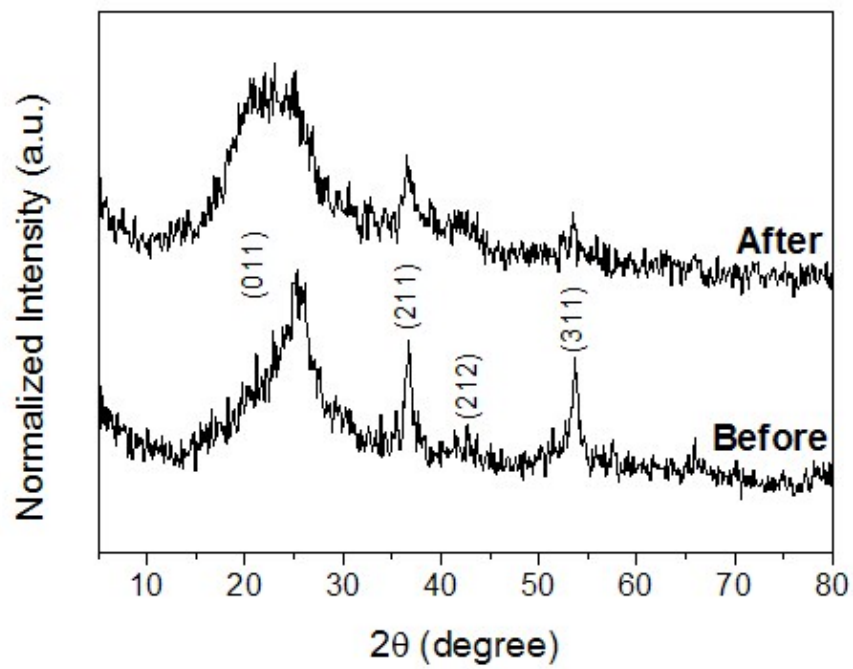

**Fig. S10** XRD patterns of MoO<sub>2</sub>-SRGO-2 before and after 100 cycles
